# Supplementary material for: Novel Y RNA-Derived Fragments Can Differentiate Canine Hepatocellular Carcinoma from Hepatocellular Adenoma
Source: MDPI journal article supplement (doi:10.3390/ani13193054), 2023-09-28
Supplement: s1 [file s1]

# Novel Y RNA-Derived Fragments Can Differentiate Canine Hepatocellular Carcinoma from Hepatocellular Adenoma

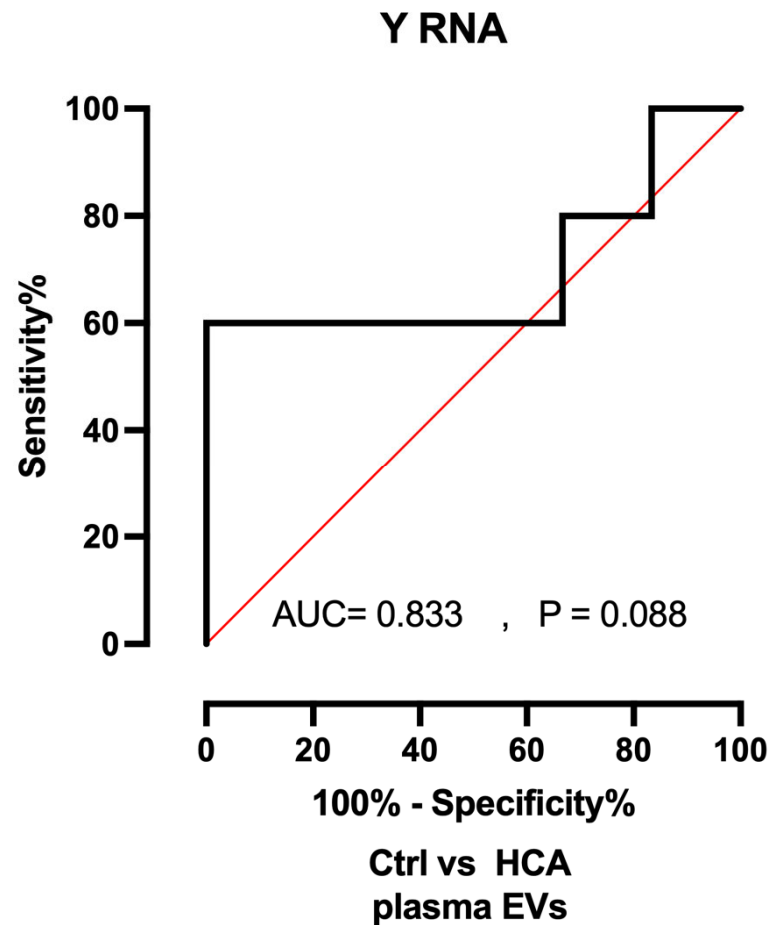

**Figure S1. ROC curves of Y RNA.** ROC curve (plasma Evs) ) of the Y RNA for differentiating HCA (n=5) compared to the ctrl (n=6). Ctrl; control, HCA; Hepatocellular adenoma, EVs; Extracellular vesicles.
